# Supplementary material for: Bimetallic nickel complexes for selective CO2 carbon capture and sequestration
Source: Royal Society of Chemistry journal article supplement (doi:10.1039/c5dt04267d), 2015-12-09
Supplement: c5dt04267d1.pdf [file c5dt04267d1.pdf]

**Supporting Information**

**Bimetallic Nickel Complexes for Selective CO<sub>2</sub> Carbon Capture and Sequestration**

Frauke Möller,<sup>a</sup> Klaus Merz,<sup>a</sup> Christian Herrmann,<sup>b</sup> Ulf-Peter Apfel<sup>a\*</sup>

<sup>a</sup>Ruhr University Bochum, Inorganic Chemistry I / Bioinorganic Chemistry, Universitätsstraße 150,  
44801 Bochum, Germany

<sup>b</sup>Ruhr University Bochum, Physical Chemistry I, Universitätsstraße 150, 44801 Bochum, Germany

## General Procedures

All reactions were performed under dry N<sub>2</sub> or Ar atmosphere using standard Schlenk techniques or in a Glovebox. All solvents were dried according to standard methods. <sup>1</sup>H, <sup>13</sup>C NMR spectra were recorded with a Bruker DPX-200 NMR or a Bruker DPX-250 NMR spectrometer at room temperature. Peaks were referenced to residual <sup>1</sup>H signals from the deuterated solvent and are reported in parts per million (ppm). UV-vis spectra were recorded on a Varian Cary 100- or a Jasco V-670 UV-vis spectrophotometer at 25 °C in acetonitrile. IR spectra were measured with a Bruker Tensor 27 FT-IR spectrometer as KBr pellet and are reported in cm<sup>-1</sup>. Mass spectra were measured with a Shimadzu QP-2010 instrument. Gas chromatography was conducted with a GC spectrometer from *Agilent Technologies*. Chemicals were ordered from Acros or Sigma-Aldrich and used without further purification.

**X-ray Data Collection and Structure Solution Refinement.** Crystals of **3**, **4**, **5**, **6**, **7**, and Ni(OAc)<sub>2</sub>(H<sub>2</sub>O)<sub>4</sub> were grown by slow diffusion of diethyl ether into solutions of the compounds dissolved in acetonitrile. Single crystals suitable for X-ray analysis were coated with Paratone-N oil, mounted on a fiber loop, and placed in a cold, gaseous N<sub>2</sub> stream on an Oxford SuperNova or an Oxford Excalibur diffractometer performing  $\Theta$ ,  $\phi$ , and  $\omega$  scans at 170(2) K. Diffraction intensities were measured using graphite-monochromatic Cu ( $\lambda$  = 1.54184 Å) or Mo K $\alpha$  radiation ( $\lambda$  = 0.71075 Å), respectively. Data collection, indexing, initial cell refinements, frame integration, final cell refinements, and absorption corrections were accomplished with the program CrysAlis (*Agilent Technologies*, Version 1.171.37.34, 2014). Space groups were assigned by analysis of the metric symmetry and systematic absences (determined by XPREP) and were further checked by PLATON<sup>1,2</sup> for additional symmetry. Structures were solved by direct methods and refined against all data in the reported  $2\theta$  ranges by full-matrix least squares on  $F^2$  with the SHELXL program suite<sup>3</sup> using the OLEX2 interface.<sup>4</sup> Crystallographic data as well as refinement parameters are presented in Table S9-10.

## Synthesis and Characterization

**Synthesis of 1:** Compound **1** was synthesized according to literature-known procedures.<sup>5</sup> Isophthalaldehyde (1 g; 7.5 mmol) was dissolved in 200 mL dry MeOH. *N*<sup>1</sup>,*N*<sup>1</sup>-bis(2-aminomethyl)-ethan-1,2-diamine (0.73 g, 5.0 mmol) was suspended in 20 mL dry MeOH and added dropwise to the solution. The solution was refluxed for 3 h, cooled to RT and the solvent was reduced 20 mL. The obtained white solid was filtered off, washed with MeOH and dried in vacuum to give 36 % (1.05 g; 1.78 mmol) of hexa-imine. <sup>1</sup>H NMR (200 MHz, CDCl<sub>3</sub>):  $\delta$  8.22 (3H, d), 8.18 (3H, d), 7.57 (3H, m), 3.57 (br s, 8H), 3.31 (6H, br s), 2.8 (18H, br s). <sup>13</sup>C NMR (50.3 MHz, CDCl<sub>3</sub>):  $\delta$  160.9, 137.1, 132.5, 129.1, 127.5, 60.1, 56.2. IR (KBr, cm<sup>-1</sup>): 3061, 2947, 2910, 2803, 1646. ESI-MS calculated for C<sub>36</sub>H<sub>42</sub>N<sub>8</sub>:  $m/z$  = 586.35. Found:  $m/z$  = 587.0. Anal. Calc. for C<sub>36</sub>H<sub>42</sub>N<sub>8</sub>·H<sub>2</sub>O: N, 18.53; C, 71.49; H, 7.33. Found: N, 18.44; C, 71.66; H: 7.36.

The hexa-imine (500 mg; 0.85 mmol) was dissolved in 70 mL dry MeOH. KBH<sub>4</sub> (0.28 g; 5.12 mmol) was added at refluxing conditions in small portions over a period of 1h. The solution was refluxed for additional 3h and cooled to RT. The solvent was removed and the residue was suspended in 2M NH<sub>4</sub>Cl-solution (20 mL), washed with CHCl<sub>3</sub> (2 x 50 mL). The combined organic phases were dried over Na<sub>2</sub>SO<sub>4</sub> and the solvent was removed under reduced pressure to yield 89 % (452 mg; 0.76 mmol) of compound **1** as white foam. <sup>1</sup>H NMR (200 MHz, CDCl<sub>3</sub>):  $\delta$  7.19 (m, 12H, Ar-H), 3.62 (s, 12H), 3.18 (br s, 6H, NH), 2.66 (m, 12H), 2.60 (m, 12H). <sup>13</sup>C NMR (CDCl<sub>3</sub>, 50.3 MHz):  $\delta$  140.0, 128.4, 127.4, 127.1, 54.9, 53.3, 47.6. IR (KBr, cm<sup>-1</sup>): 3305 (br m, NH), 3056 (m, CH), 2956 (m, CH<sub>2</sub>), 2835 (m, CH<sub>2</sub>), 2812 (m, CH<sub>2</sub>), 1454, 1266. ESI-MS calc. for C<sub>36</sub>H<sub>54</sub>N<sub>8</sub>:  $m/z$  = 598.45. Found:  $m/z$  = 599.2. Anal. Calc. for C<sub>36</sub>H<sub>52</sub>K<sub>2</sub>N<sub>8</sub> · 1/2 H<sub>2</sub>O: N, 16.38; C, 63.22; H, 7.81. Found: N, 16.09; C, 62.75; H, 7.66.

**Synthesis of 2:** 5-(*Tert*-butyl)isophthalaldehyde (15.78 mmol; 3 g) was dissolved in 900 mL dry MeOH. *N*<sup>1</sup>,*N*<sup>1</sup>-bis(2-aminomethyl)-ethan-1,2-diamine (10.52 mmol; 1.6 mL) was suspended in 20 mL dry MeOH and added dropwise to the initial solution. The solution was refluxed for 3 d, cooled to RT and the solvent was reduced to 20 mL. The resulting white solid was filtered off, washed with little MeOH and dried in vacuum to give 48 % of the hexa-imine. <sup>1</sup>H NMR (200 MHz, CDCl<sub>3</sub>): δ 8.25 (s, 8H), 7.59 (s, 6 H), 3.79 (br s, 4H), 3.29 (br s, 3 H), 2.94 (br s, 5H), 2.71 (br s, 6H). <sup>13</sup>C NMR (50.3 MHz, CDCl<sub>3</sub>): δ 161.1, 152.3, 136.8, 130.3, 124.6, 60.3, 56.4, 51.0, 35.3, 31.6. IR (KBr, cm<sup>-1</sup>): 2960, 2906, 2814, 1643 (C=N), 1473, 1365. ESI-MS calc. for C<sub>48</sub>H<sub>66</sub>N<sub>8</sub>: *m/z* = 754.54. Found: *m/z* = 755.3. Anal. Calc. for C<sub>48</sub>H<sub>66</sub>N<sub>8</sub> · MeOH: N, 14.24; C, 74.77; H, 8.96. Found: N, 14.35; C, 74.01; H, 8.55.

The hexa-imine (1.98 mmol; 1.5 g) was dissolved in 100 mL dry MeOH. KBH<sub>4</sub> (11.93 mmol; 643 mg) was added under reflux in small portions. The solution was refluxed for additional 3h and subsequently cooled to RT. The solvent was removed under reduced pressure. The residue was suspended in 2M NH<sub>4</sub>Cl-solution, washed with CHCl<sub>3</sub> (3 x 100 mL). The combined organic phases were dried over Na<sub>2</sub>SO<sub>4</sub> and the solvent was removed under reduced pressure to yield 98 % of compound **2** as white foam. <sup>1</sup>H NMR (200 MHz, CDCl<sub>3</sub>): δ 7.20 (s, 9H), 6.90 (s, 3H), 3.59 (s, 12H), 2.66 (br d, 24 H), 1.27 (2, 27 H). <sup>13</sup>C NMR (5.3 MHz, CDCl<sub>3</sub>): δ 151.8, 125.0, 54.6, 53.3, 47.7, 34.8, 31.5. IR (KBr, cm<sup>-1</sup>): 3422 (br m, NH), 2959 (m, CH), 2861 (m, CH<sub>2</sub>), 2816 (m, CH<sub>2</sub>), 1602, 1459, 1057. ESI-MS calc. for C<sub>48</sub>H<sub>78</sub>N<sub>8</sub>: *m/z* = 766.64. Found: *m/z* = 767.6. Anal. Calc. for K<sub>3</sub>C<sub>48</sub>H<sub>78</sub>N<sub>8</sub> · 2 MeOH: N, 11.81; C, 63.31; H, 9.41. Found: N, 11.47; C, 63.72; H, 9.42.

**[Ni<sub>2</sub>(1)(H<sub>2</sub>O)(Cl)(MeCN)](ClO<sub>4</sub>)<sub>3</sub>, 3:** Compound **1** (0.17 mmol; 100 mg) was dissolved in 10 mL dry MeCN/EtOH (4:1) and Ni(ClO<sub>4</sub>)<sub>2</sub>·6H<sub>2</sub>O (0.33 mmol; 121 mg), dissolved in 4mL MeCN, was added. The blue solution was stirred for 1d under N<sub>2</sub>-atmosphere. The solvent was removed under N<sub>2</sub>-atmosphere and crystallized from MeCN/Et<sub>2</sub>O to yield blue crystals of compound **3** in 56 % (0.03 mmol; 105 mg) yield. IR (KBr, cm<sup>-1</sup>): 3567, 3414, 3256, 2931, 2872, 1614, 1451, 1445, 1331, 1089, 756 (ClO<sub>4</sub><sup>-</sup>), 702 (ClO<sub>4</sub><sup>-</sup>), 626 (ClO<sub>4</sub><sup>-</sup>). ESI-MS calc. for [C<sub>38</sub>H<sub>59</sub>ClN<sub>9</sub>Ni<sub>2</sub>O](ClO<sub>4</sub>) + CH<sub>3</sub>CN: *m/z* = 947.3. Found: *m/z* = 947.0 / 949.0. Anal. Calc. for [C<sub>38</sub>H<sub>58</sub>ClN<sub>9</sub>Ni<sub>2</sub>O](ClO<sub>4</sub>)<sub>3</sub> + CH<sub>3</sub>CN: N, 11.78; C, 41.47; H, 5.40. Found: N, 11.34; C, 41.34; H, 5.04. UV-vis (MeCN, RT): 396 nm, 538 nm, 628 nm.

**[Ni<sub>2</sub>(2)(H<sub>2</sub>O)(Cl)(MeCN)](ClO<sub>4</sub>)<sub>3</sub>, 4:** Compound **2** (0.13 mmol; 100 mg) was dissolved in 8 mL MeCN/EtOH (4:1) and Ni(ClO<sub>4</sub>)<sub>2</sub>·6H<sub>2</sub>O (0.26 mmol; 95 mg), dissolved in 2 mL MeCN, was added. The blue solution was stirred for 30 min. CO<sub>2</sub> was bubbled through the solution, forming a light blue solution, and stirred for additional 2 h. The formed solid was filtered off and the filtrate was crystallized from MeCN/Et<sub>2</sub>O to give compound **4** as dark blue crystals in 52 % (0.068 mmol) yield. IR (KBr, cm<sup>-1</sup>): 3561, 3256 (br), 2962, 2871, 1605, 1472, 1440, 1089, 626. ESI-MS calc. for [C<sub>50</sub>H<sub>83</sub>ClN<sub>9</sub>Ni<sub>2</sub>O](ClO<sub>4</sub>) + CH<sub>3</sub>CN: *m/z* = 1119.6. Found: *m/z* = 1119.5. Anal. Calc. for [C<sub>50</sub>H<sub>83</sub>ClN<sub>9</sub>Ni<sub>2</sub>O](ClO<sub>4</sub>)<sub>3</sub> + CH<sub>3</sub>CN: N, 10.62; C, 47.37; H, 6.57. Found: N, 10.76; C, 47.46; H, 6.83. UV-vis (MeCN, RT): 348 nm, 628 nm.

**[Ni<sub>2</sub>(1)(HCO<sub>3</sub>)(H<sub>2</sub>O)(MeCN)](ClO<sub>4</sub>)<sub>2</sub>(Cl), 5:** Compound **1** (0.17 mmol; 100 mg) was dissolved in 10 mL MeCN/EtOH (4:1) and Ni(ClO<sub>4</sub>)<sub>2</sub>·6H<sub>2</sub>O (0.33 mmol; 121 mg), dissolved in 4 mL MeCN, was added. The blue solution was stirred for 30 min. CO<sub>2</sub> was bubbled through the solution, forming a light blue solution, and stirred for additional 2 h. The solid was separated and the filtrate was slowly evaporated to yield compound **5** as dark blue crystals in 50 % (0.084 mmol; 95 mg) yield. IR (KBr, cm<sup>-1</sup>): 3397, 3258, 2926, 2868, 1673 (CO<sub>2</sub>), 1638 (CO<sub>2</sub>), 1451, 1371, 1090, 626. ESI-MS calc. for

[C<sub>37</sub>H<sub>55</sub>N<sub>8</sub>Ni<sub>2</sub>O<sub>3</sub>](ClO<sub>4</sub>):  $m/z$  = 874.26. Found  $m/z$  = 874.8. Anal. Calc. for [C<sub>39</sub>H<sub>60</sub>N<sub>9</sub>Ni<sub>2</sub>O<sub>4</sub>](Cl)(ClO<sub>4</sub>)<sub>2</sub> + 2H<sub>2</sub>O: N, 11.39; C, 42.33; H, 5.83. Found: N, 11.87; C, 42.46; H, 6.00. UV-vis (MeCN, RT): 379 nm, 482 nm, 633 nm.

Likewise, this compound can be generated from a solution of compound **3** in acetonitrile either by stirring under air or bubbling CO<sub>2</sub> through the solution. The workup procedure subsequently applied is the same as described before.

**[Ni<sub>2</sub>(1)(H<sup>13</sup>CO<sub>3</sub>)(H<sub>2</sub>O)](ClO<sub>4</sub>)Cl, <sup>13</sup>CO<sub>2</sub>-5:** Compound **1** (0.17 mmol; 100 mg) was dissolved in 10 mL MeCN/EtOH (4:1) and Ni(ClO<sub>4</sub>)<sub>2</sub>·6H<sub>2</sub>O (0.33 mmol; 121 mg), dissolved in 4 mL MeCN, was added. The blue solution was stirred for 30 min. <sup>13</sup>CO<sub>2</sub> was bubbled through the solution, forming a light blue solution, which was stirred for additional 2 h. The solid was separated and the filtrate was crystallized from MeCN/Et<sub>2</sub>O to yield compound **5a** as blue powder in 36 % (0.06 mmol; 66 mg) yield. ESI-MS calc. for [<sup>12</sup>C<sub>36</sub><sup>13</sup>C<sub>1</sub>H<sub>55</sub>N<sub>8</sub>Ni<sub>2</sub>O<sub>3</sub>](ClO<sub>4</sub>)  $m/z$  = 875.26. Found  $m/z$  = 875.3.

**[Ni<sub>2</sub>(1)(N<sub>3</sub>)(MeCN)](ClO<sub>4</sub>)<sub>3</sub>, **6**:** Compound **1** (59 mg; 0.084 mmol) was dissolved in 10 mL MeCN/EtOH (1:1) and Ni(ClO<sub>4</sub>)<sub>2</sub>·6 H<sub>2</sub>O (73 mg; 0.2 mmol), dissolved in 10 mL MeCN/EtOH (1:1), was added. The blue solution was stirred for 5 min. NaN<sub>3</sub> (6.8 mg; 0.105 mmol) was dissolved in 5 mL EtOH/H<sub>2</sub>O, and added to the solution. The solvent was removed after 1d and the residue crystallized from MeCN via slow evaporation of the solvent. Compound **6** was obtained in 24 % (25.3 mg; 0.024 mmol) yield. IR (KBr)  $\tilde{\nu}$  [cm<sup>-1</sup>] = 3480 (br, NH), 3069 (m, CH), 2926, 2854 (m, CH<sub>2</sub>), 2202, 2120 (s, N<sub>3</sub>), 1443, 1147, 1115, 1086 (s, ClO<sub>4</sub><sup>-</sup>), 800, 757, 701, 631 (m, ClO<sub>4</sub><sup>-</sup>). MS calc. for [C<sub>36</sub>H<sub>54</sub>N<sub>11</sub>Ni<sub>2</sub>](ClO<sub>4</sub>)<sub>2</sub>:  $m/z$  = 954.23. Found:  $m/z$  = 954.7. Anal. Calc. for [C<sub>36</sub>H<sub>54</sub>N<sub>11</sub>Ni<sub>2</sub>](ClO<sub>4</sub>)<sub>3</sub>·MeCN·2H<sub>2</sub>O: N, 14.83; C, 40.26; H, 5.42. Found: N, 14.84; C, 40.04; H, 5.20. UV-vis (MeCN, RT): 348 nm, 607 nm.

Likewise this compound can be generated by treatment of compound **5** or <sup>13</sup>CO<sub>2</sub>-5 with NaN<sub>3</sub> (1 equiv.) in acetonitrile and following the work up procedure as described above.

**[Ni<sub>2</sub>(2)(N<sub>3</sub>)](ClO<sub>4</sub>)<sub>3</sub>, **7**:** Compound **2** (20 mg; 0.026 mmol) was dissolved in 2 mL MeCN/EtOH (1:1) and Ni(ClO<sub>4</sub>)<sub>2</sub>·6 H<sub>2</sub>O (48 mg; 0.13 mmol), dissolved in 2 mL MeCN/EtOH (1:1), was added. The blue solution was stirred for 5 min. NaN<sub>3</sub> (2 mg; 0.027 mmol) was dissolved in 5 mL EtOH/H<sub>2</sub>O, and added to the solution. The solvent was removed after 1d stirring and the residue crystallized from MeCN by slow removal of the solvent. Compound **7** was obtained in 77 % (23 mg; 0.020 mmol) yield. IR (KBr)  $\tilde{\nu}$  [cm<sup>-1</sup>] = 3406 (br, NH), 2959 (m, CH<sub>2</sub>), 2854 (m, CH<sub>2</sub>), 2194 (s, N<sub>3</sub>), 1607, 1438, 136, 1086 (s, ClO<sub>4</sub><sup>-</sup>), 880, 757, 701, 631 (m, ClO<sub>4</sub><sup>-</sup>). MS calc. for [C<sub>48</sub>H<sub>78</sub>N<sub>11</sub>Ni<sub>2</sub>](ClO<sub>4</sub>)<sub>2</sub>:  $m/z$  = 1222.4. Found:  $m/z$  = 1123.8. Anal. Calc. for [C<sub>48</sub>H<sub>78</sub>N<sub>11</sub>Ni<sub>2</sub>](ClO<sub>4</sub>)<sub>3</sub>·MeCN·H<sub>2</sub>O: N, 13.09; C, 46.77; H, 6.52. Found: N, 13.06; C, 46.96; H, 6.86.

Likewise this compound can be generated by treatment of compound **4** with NaN<sub>3</sub> (1 equiv.) in acetonitrile and following the work up procedure as described above.

**[Ni<sub>2</sub>L<sup>1</sup>(SCN)](ClO<sub>4</sub>)<sub>3</sub>, **8**:** Compound **1** (100 mg; 0.17 mmol) and Ni(ClO<sub>4</sub>)<sub>2</sub>·6 H<sub>2</sub>O (121 mg; 0.33 mmol) were dissolved in 8 mL MeCN. KSCN (16 mg, 0.17 mmol) was added after 30 min. The solution was stirred for 1d. The solvent was removed and the crude material was crystallized from MeCN/Et<sub>2</sub>O. MS Calc. for [C<sub>37</sub>H<sub>54</sub>N<sub>9</sub>Ni<sub>2</sub>S](ClO<sub>4</sub>)<sub>2</sub>:  $m/z$  = 970.2. Found:  $m/z$  = 971.8.

**General irradiation procedure:** Complex **6** was dissolved in acetonitrile in a quartz cuvette. Irradiation of the solution was performed with a 150 W Xe-lamp under ambient conditions. The reaction progress was monitored by ESI-MS and UV-vis spectroscopy.



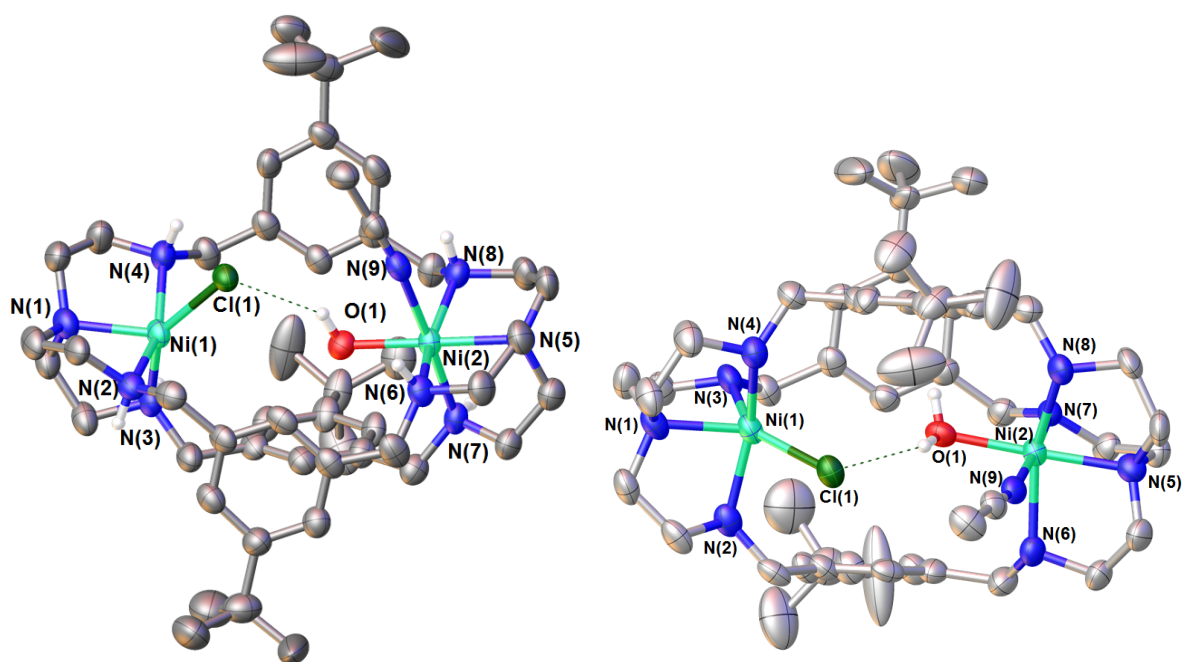

**Figure S1:** Molecular structure of compound **4** from side (left) and top (right) (counter ions and hydrogen atoms were omitted for clarity).

**Table S1:** Selected bond length [Å] and angles [°] of the dinickel complex **4**.

|                 |          |                 |          |
|-----------------|----------|-----------------|----------|
| Ni(1)-Cl(1)     | 2.347(2) | Ni(2)-N(5)      | 2.076(6) |
| Ni(1)-N(1)      | 2.065(6) | Ni(2)-N(6)      | 2.209(6) |
| Ni(1)-N(2)      | 2.132(6) | Ni(2)-N(7)      | 2.131(6) |
| Ni(1)-N(3)      | 2.087(6) | Ni(2)-N(8)      | 2.170(6) |
| Ni(1)-N(4)      | 2.146(6) | Ni(2)-N(9)      | 2.134(7) |
| Ni(1)-O(1)      | 2.036(4) |                 |          |
| N(2)-Ni(1)-N(4) | 157.3(2) | N(5)-Ni(2)-O(1) | 177.8(2) |
| N(8)-Ni(2)-N(6) | 159.4(2) | N(5)-Ni(2)-N(9) | 98.2(2)  |

**Table S2:** Selected bond length [Å] and angles [°] of the dinickel complex **3**.

|                 |            |                 |            |
|-----------------|------------|-----------------|------------|
| Ni(1)-N(1)      | 2.072(3)   | Ni(2)-N(5)      | 2.068(3)   |
| Ni(1)-N(2)      | 2.205(3)   | Ni(2)-N(6)      | 2.131(3)   |
| Ni(1)-N(3)      | 2.118(2)   | Ni(2)-N(7)      | 2.088(3)   |
| Ni(1)-N(4)      | 2.150(3)   | Ni(2)-N(8)      | 2.142(3)   |
| Ni(1)-N(9)      | 2.167(3)   | Ni(2)-Cl(1)     | 2.3261(10) |
| Ni(1)-O(1)      | 2.043(2)   |                 |            |
| N(2)-Ni(1)-N(4) | 159.30(10) | N(6)-Ni(2)-N(8) | 156.00(11) |
| N(1)-Ni(1)-N(9) | 96.99(11)  |                 |            |

**Table S3:** Selected bond length [Å] and angles [°] of the dinickel complex **5**.

|                 |            |                |            |
|-----------------|------------|----------------|------------|
| Ni(1)-N(1)      | 2.0912(18) | Ni(2)-N(5)     | 2.0916(19) |
| Ni(1)-N(2)      | 2.1879(19) | Ni(2)-N(6)     | 2.145(2)   |
| Ni(1)-N(3)      | 2.123(2)   | Ni(2)-N(7)     | 2.139(2)   |
| Ni(1)-N(4)      | 2.1729(18) | Ni(2)-N(8)     | 2.125(2)   |
| Ni(1)-O(4)      | 2.1773(17) | Ni(2)-O(2)     | 1.9913(15) |
| Ni(1)-O(1)      | 2.0186(15) | O(1)-C(1)      | 1.248(3)   |
| O(3)-C(1)       | 1.359(3)   | O(2)-C(1)      | 1.252(3)   |
|                 |            |                |            |
| N(2)-Ni(1)-N(4) | 174.98(7)  | O(1)-C(1)-O(2) | 124.6(2)   |
| N(8)-Ni(2)-N(6) | 154.87(8)  | O(2)-C(1)-O(3) | 115.9(2)   |
|                 |            | O(1)-C(1)-O(3) | 119.5(2)   |

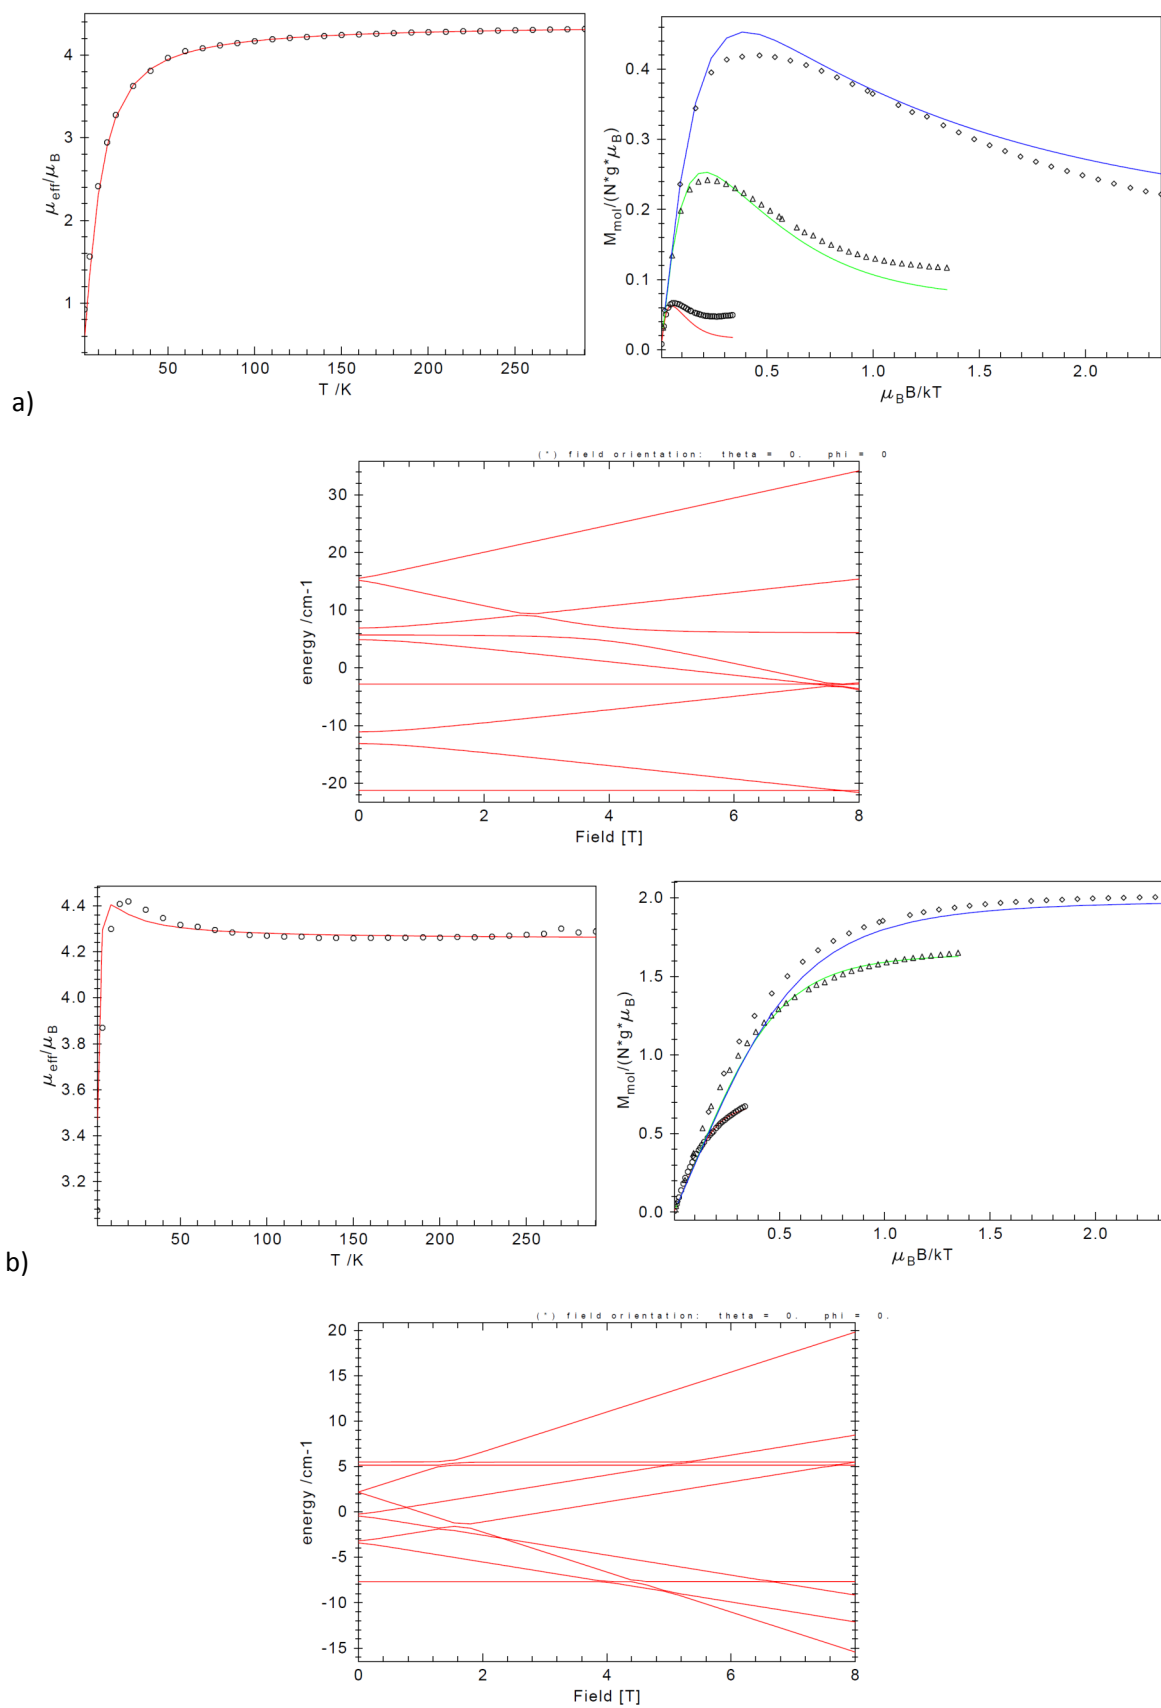

**Figure S2:** SQUID-data, recorded with a SQUID instrument from *Quantum Design* at 7T (2K - 310K) for compound **5** (a) and **4** (b). MultiVu was used as acquisition software. Compound **5**:  $S = 1.0$ ,  $D = 9.30 \text{ cm}^{-1}$  and  $J = -4.5 \text{ cm}^{-1}$ ; compound **4**:  $S = 1.0$ ,  $D = 5.5 \text{ cm}^{-1}$  and  $J = 0.74 \text{ cm}^{-1}$ .

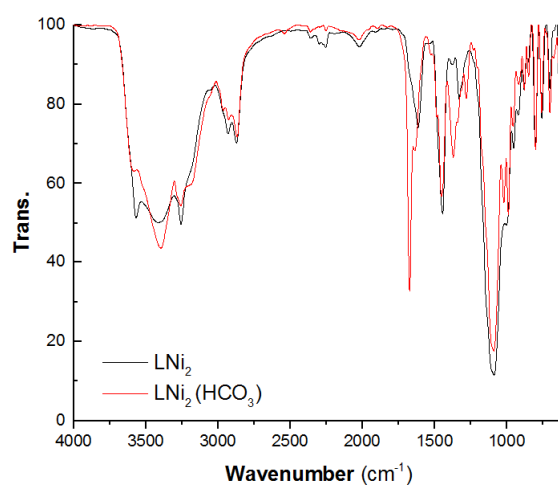

**Figure S3:** IR spectra of **3** and **5** measured as KBr-pellets.

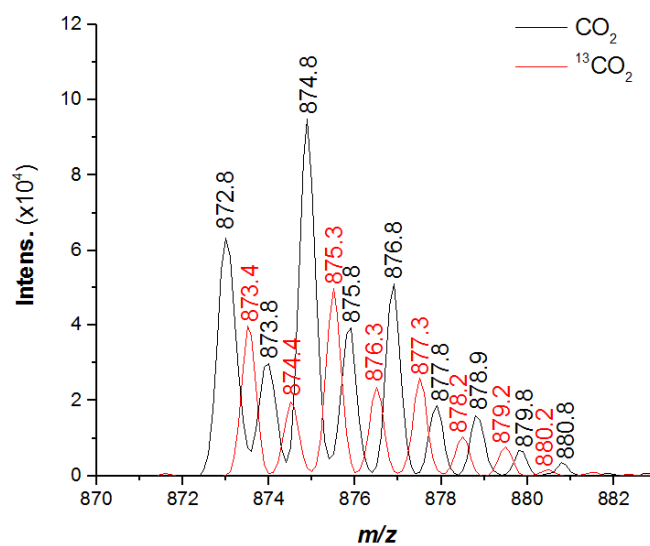

**Figure S4:** ESI-mass spectra of **5** with  $\text{CO}_2$  and  $^{13}\text{CO}_2$ .  
A full-range mass spectrum of **5** is provided in figure S13.

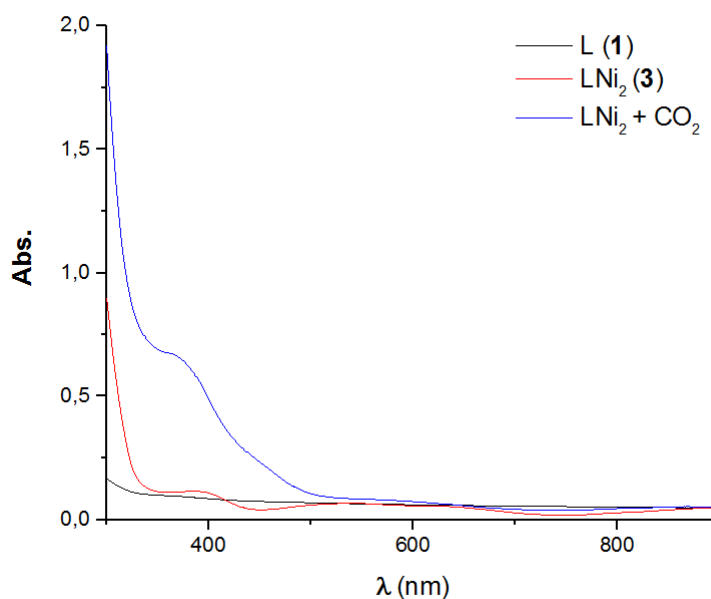

**Figure S5a:** UV-vis spectra, measured in acetonitrile at RT, of the fixation of CO<sub>2</sub> with LNi<sub>2</sub> **3**.

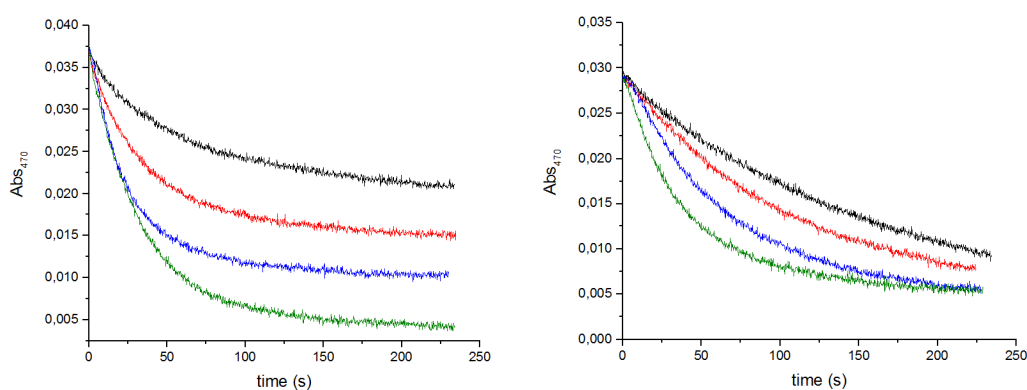

**Figure S5b:** Time-dependent spectrophotometry, recorded with a UV-vis spectrophotometer Specord® S600 from *Analytik Jena* and a SFA-20 Rapid Kinetics Accessory from *HI-Tech Scientific*, at various temperatures (black trace 15°C; red trace 25°C; blue trace 35°C; green trace 45°C) and CO<sub>2</sub> concentrations (0.28 mol/L CO<sub>2</sub> (left); 0.09 mol/L CO<sub>2</sub> (right)). For temperature control, an external thermostat and a cuvette holder with temperature unit was used. For the measurement, a 6 mM solution of LNi<sub>2</sub> in degassed acetonitrile was used. The solutions with different CO<sub>2</sub> concentrations were prepared from a CO<sub>2</sub> saturated acetonitrile solution (0.28 mol/L CO<sub>2</sub> at 25 °C) and degassed acetonitrile.<sup>6</sup>

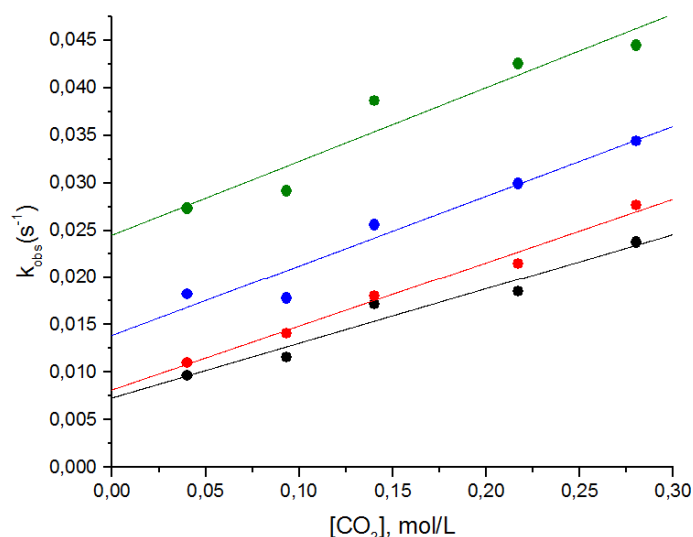

**Figure S5c:** Stopped-flow spectrophotometry: comparison of the different  $k_{\text{obs}}$  values at different temperatures and concentrations (black trace 15°C; red trace 25°C; blue trace 35°C; green trace 45°C). The data and fitting results are listed in table S4/S5.

**Table S4:**  $k_{\text{obs}}$  values ( $\text{s}^{-1}$ ) of the stopped flow measurement of the  $\text{CO}_2$  fixation of a 6 mM solution of complex **3** at different temperatures and  $\text{CO}_2$  concentrations. Kinetic traces (Figure S5b) were fitted with the equation for first order reaction with  $A = A_0 \cdot \exp(-k_{\text{obs}} \cdot t)$ , with  $A$  = absorbance,  $A_0$  = initial absorbance,  $t$  = time in s.

| T [K]                                 | 288.15  | 298.15  | 308.15  | 318.15  |
|---------------------------------------|---------|---------|---------|---------|
| $[\text{CO}_2]_{\text{acetonitrile}}$ |         |         |         |         |
| 0.28 mol/L                            | 0.02379 | 0.02766 | 0.03443 | 0.04449 |
| 0.217 mol/L                           | 0.01856 | 0.02153 | 0.02996 | 0.04256 |
| 0.14 mol/L                            | 0.01723 | 0.01809 | 0.02562 | 0.03865 |
| 0.093 mol/L                           | 0.01162 | 0.01413 | 0.01784 | 0.02918 |
| 0.04 mol/L                            | 0.00968 | 0.01106 | 0.0823  | 0.02736 |

**Table S5:** The  $k_2$ -values at different temperatures are obtained from the slope of the plot  $k_{\text{obs}}$  vs.  $[\text{CO}_2]$  (left). Resulting activation parameters of the Eyring plot were obtained from the linear regression (Figure S6) and were calculated from the equation  $\ln k = -\Delta H^\ddagger/RT + \Delta S^\ddagger/R$  (right).

| T [K]  | $k_2 [\text{M}^{-1}\text{s}^{-1}]$ | $\Delta H^\ddagger [\text{kJ/mol}]$ | $\Delta S^\ddagger [\text{J/mol}\cdot\text{K}]$ |
|--------|------------------------------------|-------------------------------------|-------------------------------------------------|
| 288.15 | $0.057 \pm 0.008$                  | $7.55 \pm 1.07$                     | $2.64 \pm 3.55$                                 |
| 298.15 | $0.067 \pm 0.005$                  |                                     |                                                 |
| 308.15 | $0.073 \pm 0.011$                  |                                     |                                                 |
| 318.15 | $0.077 \pm 0.014$                  |                                     |                                                 |

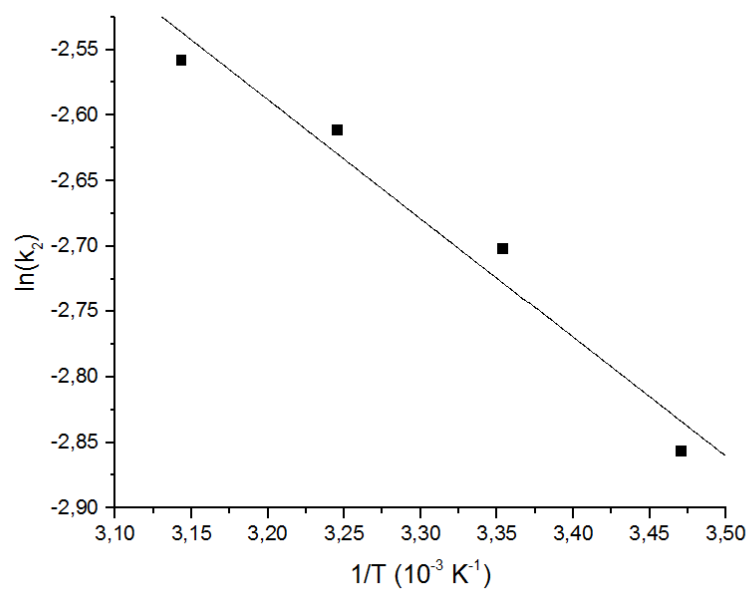

**Figure S6:** Eyring plot for the reaction of 6 mM complex **3** with carbon dioxide in acetonitrile. Data points are listed in table S5. Linear regression yields the activation parameters shown in table S5.

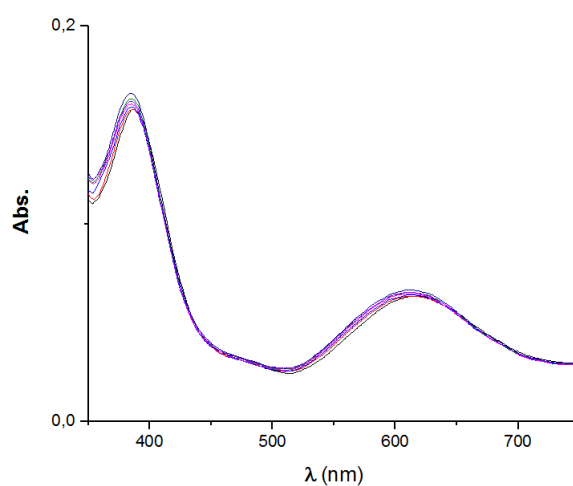

**Figure S7:** UV-vis spectrum in acetonitrile showing the temperature stability of **5** at 65 °C.

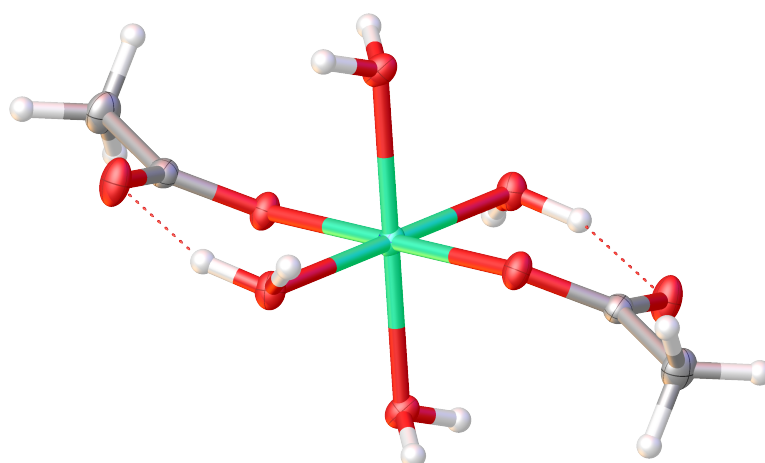

**Figure S8:** Re-determined molecular structure of  $[\text{Ni}(\text{OAc})_2(\text{H}_2\text{O})_4]$  crystallized from DMF/Et<sub>2</sub>O at RT. See also Ref [7].

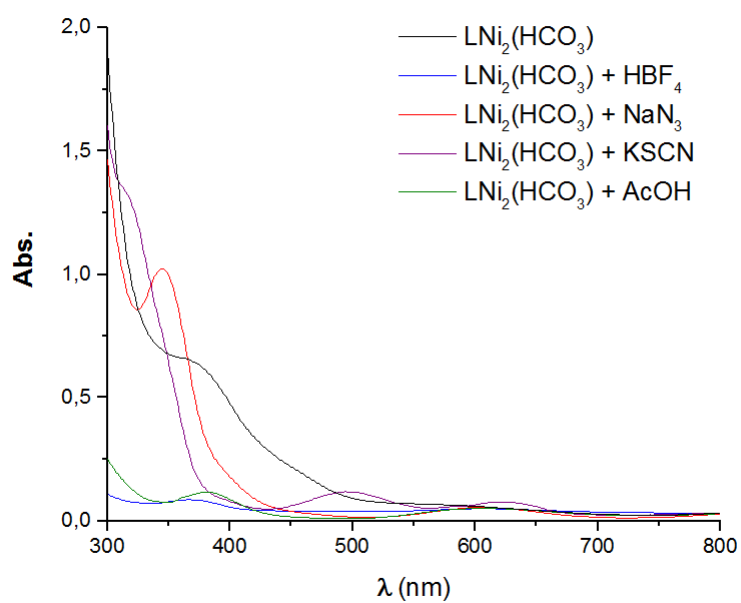

**Figure S9a:** UV-vis spectra in acetonitrile at RT of the exchange reactions of **5** with  $\text{N}_3^-$ ,  $\text{SCN}^-$  and  $\text{HBF}_4$ .



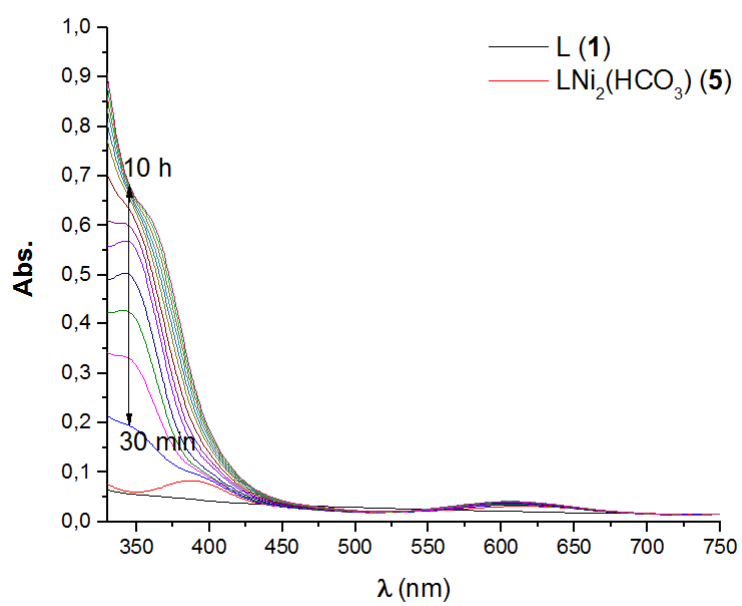

**Figure S9b:** Time-dependent UV-vis spectra in acetonitrile at RT, of the exchange of  $\text{HCO}_3^-$  with 1 eq.  $\text{N}_3^-$ .

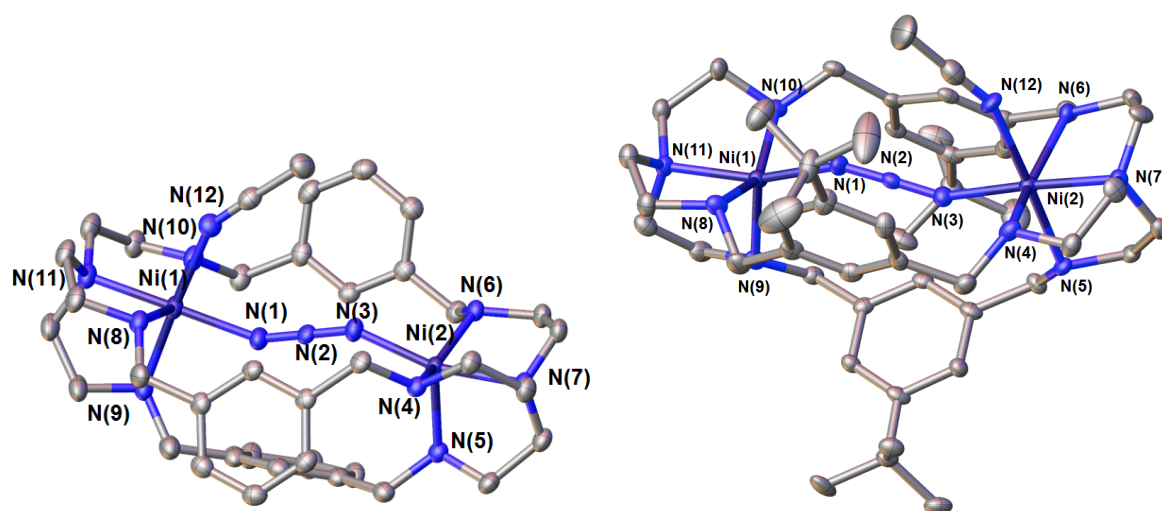

**Figure S10:** Molecular structure of compound **6** (right) and its *tert*-butyl version **7** (left) (hydrogen atoms were omitted for clarity).

**Table S6:** Selected bond length [Å] and angles [°] for complex **6**.

|                 |            |                 |           |
|-----------------|------------|-----------------|-----------|
| N(1)-N(2)       | 1.161(3)   | Ni(2)-N(7)      | 2.104(2)  |
| N(2)-N(3)       | 1.171(3)   | Ni(1)-N(8)      | 2.206(2)  |
| Ni(1)-N(1)      | 2.019(2)   | Ni(1)-N(9)      | 2.113(2)  |
| Ni(2)-N(3)      | 1.990(2)   | Ni(1)-N(10)     | 2.157(2)  |
| Ni(2)-N(4)      | 2.114(2)   | Ni(1)-N(11)     | 2.087(2)  |
| Ni(2)-N(5)      | 2.074(2)   | Ni(1)-N(12)     | 2.184(2)  |
| Ni(2)-N(6)      | 2.127(2)   |                 |           |
| N(1)-N(2)-N(3)  | 179.4(2)   | N(8)-Ni(1)-N(1) | 100.33(8) |
| Ni(1)-N(1)-N(2) | 149.83(18) | N(4)-Ni(2)-N(3) | 95.42(8)  |
| Ni(2)-N(3)-N(2) | 148.08(19) |                 |           |

**Table S7:** Selected bond length [Å] and angles [°] for complex **7**. [See also Ref. <sup>8</sup> for comparison]

|                 |          |                 |          |
|-----------------|----------|-----------------|----------|
| N(1)-N(2)       | 1.166(9) | Ni(2)-N(7)      | 2.072(6) |
| N(2)-N(3)       | 1.174(9) | Ni(1)-N(8)      | 2.098(6) |
| Ni(1)-N(1)      | 1.972(6) | Ni(1)-N(9)      | 2.056(6) |
| Ni(2)-N(3)      | 1.988(6) | Ni(1)-N(10)     | 2.130(6) |
| Ni(2)-N(4)      | 2.150(6) | Ni(1)-N(11)     | 2.098(6) |
| Ni(2)-N(5)      | 2.114(5) | Ni(1)-N(12)     | 2.075(6) |
| Ni(2)-N(6)      | 2.247(6) |                 |          |
| N(1)-N(2)-N(3)  | 179.1(7) | N(8)-Ni(1)-N(1) | 149.5(2) |
| Ni(1)-N(1)-N(2) | 150.2(6) | N(4)-Ni(2)-N(3) | 158.4(2) |
| Ni(2)-N(3)-N(2) | 153.5(5) |                 |          |

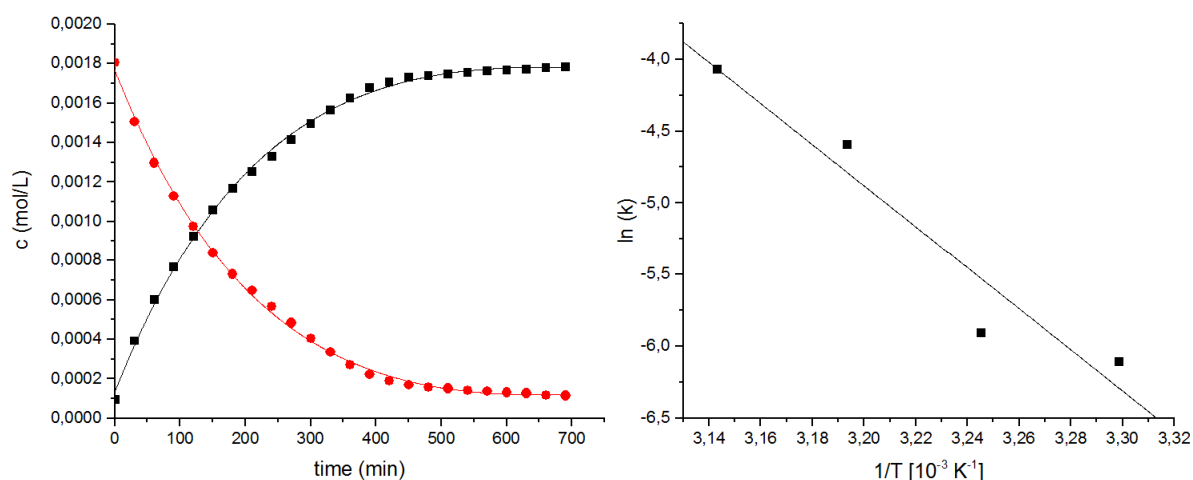

**Figure S11:** Time-dependent UV-vis spectra of the exchange of  $\text{HCO}_3^-$  with  $\text{N}_3^-$  at  $25^\circ\text{C}$  in acetonitrile. The change in absorption at 348 nm was plotted against the time. The data were fitted with a single exponential fit ( $k_{\text{obs}, 303.15\text{K}} = 0.00223 \text{ min}^{-1}$ ) (left). The Eyring plot for this exchange reaction at different temperatures is shown on the right. The linear regression yields the activation parameters provided in table S8.

**Table S8:** Observed  $k_{\text{obs}}$ -values for different temperatures, obtained from single exponential fit (left). Activation parameters were calculated from the Eyring plot,  $\ln k_{\text{obs}} = -\Delta H^\ddagger/RT + \Delta S^\ddagger/R$  (right).

| T [K]  | $k_{\text{obs}} [\text{min}^{-1}]$ |                                     |                                                 |
|--------|------------------------------------|-------------------------------------|-------------------------------------------------|
| 303.15 | $0.00223 \pm 1.18 \cdot 10^{-3}$   | $\Delta H^\ddagger [\text{kJ/mol}]$ | $\Delta S^\ddagger [\text{J/mol}\cdot\text{K}]$ |
| 308.15 | $0.00272 \pm 2.59 \cdot 10^{-4}$   | $118.9 \pm 23.6$                    | $340.04 \pm 75.99$                              |
| 313.15 | $0.01012 \pm 5.17 \cdot 10^{-4}$   |                                     |                                                 |
| 318.15 | $0.01712 \pm 6.52 \cdot 10^{-4}$   |                                     |                                                 |

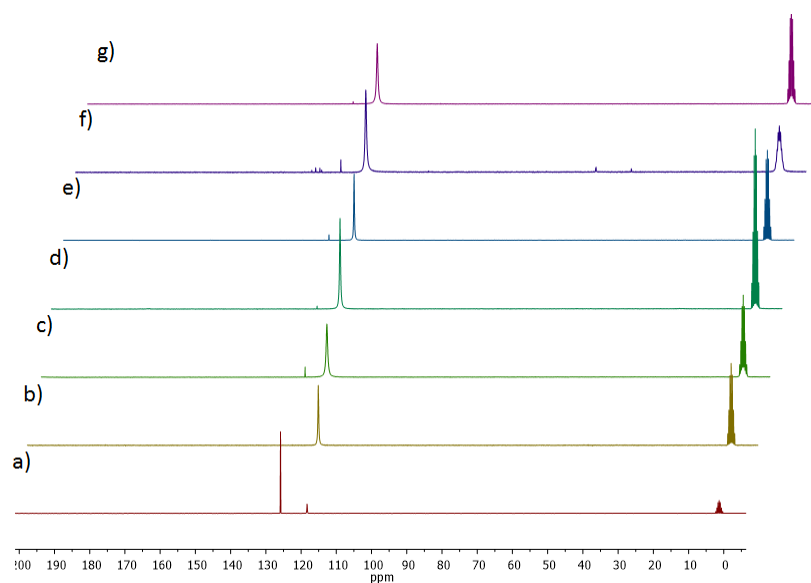

**Figure S12a:**  $^{13}\text{C}$ -NMR spectra (50.3 MHz,  $\text{MeCN-d}_3$ ) of the exchange reactions at RT: a)  $^{13}\text{CO}_2$  in  $\text{MeCN-d}_3$ , b)  $\text{LNi}_2(\text{H}^{13}\text{CO}_2)$   $^{13}\text{CO}_2$ -**5**, c)  $^{13}\text{CO}_2$ -**5** with  $\text{AcOH}$  d)  $^{13}\text{CO}_2$ -**5** with 1 eq.  $\text{NaN}_3$ , e)  $^{13}\text{CO}_2$ -**5** with 1 eq.  $\text{KSCN}$ , f)  $^{13}\text{CO}_2$ -**5** with  $\text{HBF}_4$ , g)  $^{13}\text{CO}_2$ -**5** with 1 eq.  $\text{NaHCO}_3$ ; 118.3 ppm and 1.3 ppm are  $\text{MeCN-d}_3$  signals.

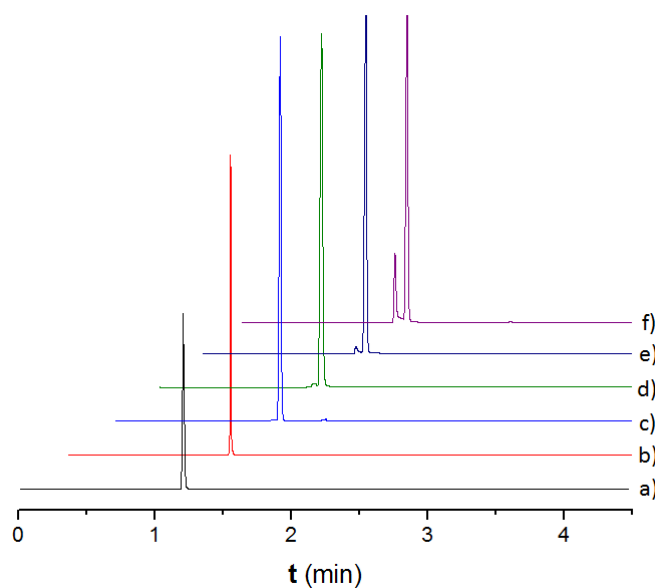

**Figure S12b:** GC spectra of the exchange reactions, performed in dry acetonitrile under inert conditions: a)  $\text{CO}_2$ , b) **5** +  $\text{NaN}_3$ , c) **5** +  $\text{AcOH}$  d) **5** +  $\text{KSCN}$ , e) **5** +  $\text{HBF}_4$ , f) **5** +  $\text{NaHCO}_3$ .

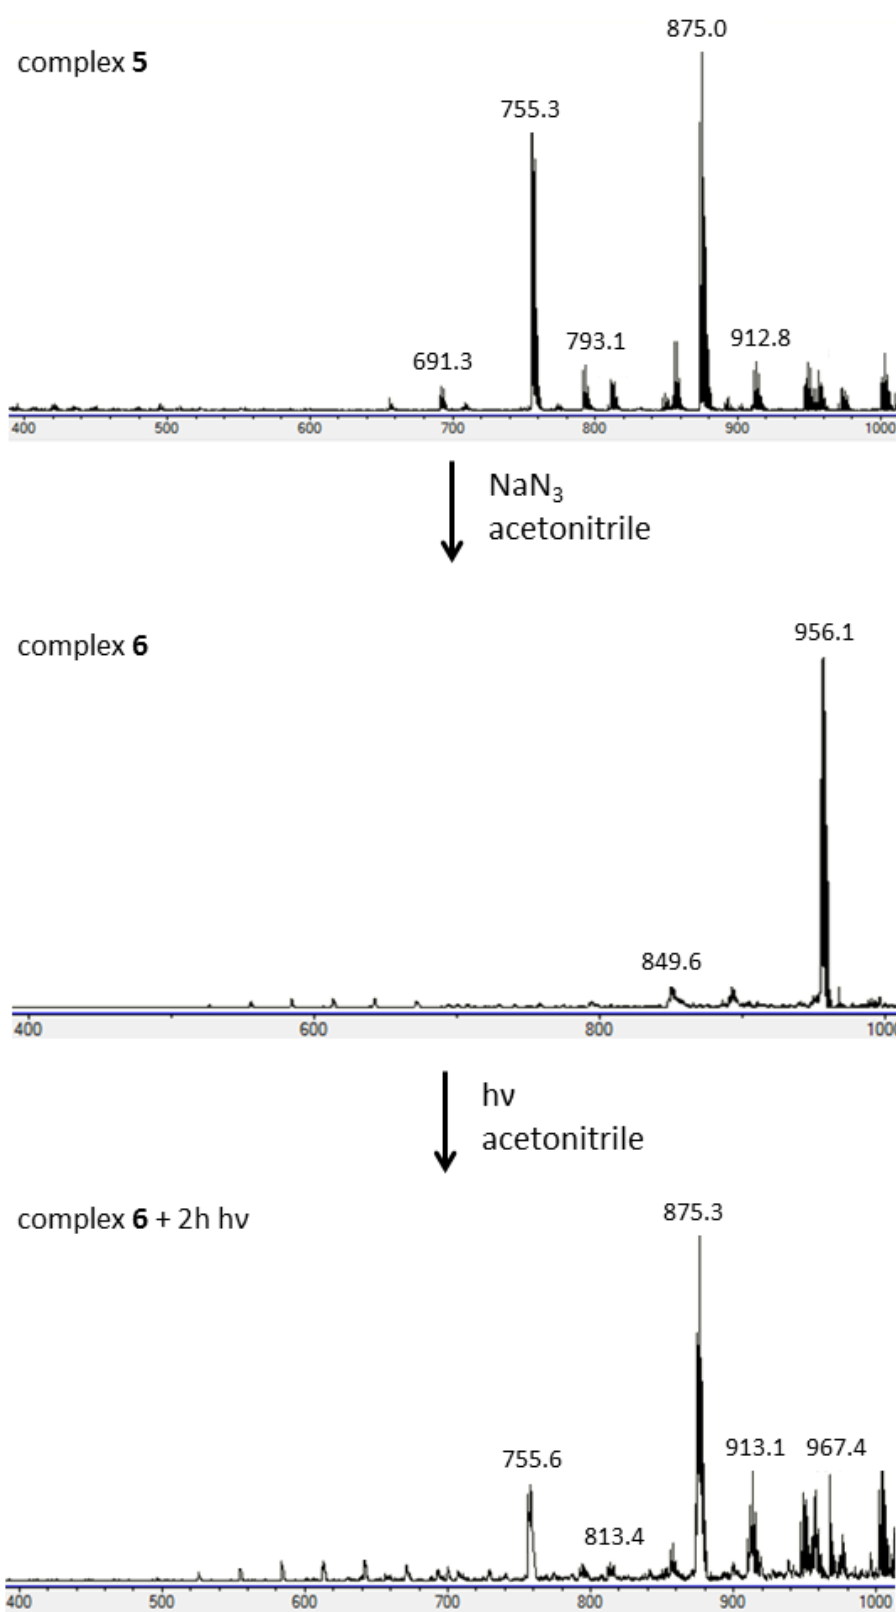

**Figure S13:** Reaction control via mass spectrometry of the exchange reaction of  $\text{HCO}_3^-$  with 1 eq.  $\text{N}_3^-$  and following photolysis of complex **6**.

**Table S9:** Crystallographic Data of compound **3**, **4**, and **7**.

|                                                           | <b>3</b>                                                                                        | <b>4</b>                                                                                       | <b>7</b>                                                                                        |
|-----------------------------------------------------------|-------------------------------------------------------------------------------------------------|------------------------------------------------------------------------------------------------|-------------------------------------------------------------------------------------------------|
| Empirical formular                                        | C <sub>46</sub> H <sub>71</sub> Cl <sub>4</sub> N <sub>13</sub> Ni <sub>2</sub> O <sub>13</sub> | C <sub>50</sub> H <sub>83</sub> Cl <sub>4</sub> N <sub>9</sub> Ni <sub>2</sub> O <sub>13</sub> | C <sub>54</sub> H <sub>87</sub> Cl <sub>3</sub> N <sub>14</sub> Ni <sub>2</sub> O <sub>12</sub> |
| Formular weight<br>[g·mol <sup>-1</sup> ]                 | 1273.38                                                                                         | 1277.47                                                                                        | 1348.15                                                                                         |
| Temperature [K]                                           | 170                                                                                             | 170                                                                                            | 170                                                                                             |
| λ (Cu K <sub>α</sub> ) [Å]                                | 1.54184                                                                                         | 1.54184                                                                                        | 1.54184                                                                                         |
| Crystal system                                            | monoclinic                                                                                      | monoclinic                                                                                     | monoclinic                                                                                      |
| Space group                                               | P2 <sub>1</sub> /c                                                                              | P2 <sub>1</sub> /c                                                                             | P2 <sub>1</sub>                                                                                 |
| a [Å]                                                     | 12.3126(2)                                                                                      | 14.0625(17)                                                                                    | 12.7102(6)                                                                                      |
| b [Å]                                                     | 20.4330(3)                                                                                      | 23.576(2)                                                                                      | 12.8900(5)                                                                                      |
| c [Å]                                                     | 23.8954(5)                                                                                      | 21.767(2)                                                                                      | 19.9985(9)                                                                                      |
| α [°]                                                     | 90.00                                                                                           | 90.00                                                                                          | 90.00                                                                                           |
| β [°]                                                     | 99.7407(18)                                                                                     | 95.325(13)                                                                                     | 102.464(4)                                                                                      |
| γ [°]                                                     | 90.00                                                                                           | 90.00                                                                                          | 90.00                                                                                           |
| V [Å <sup>3</sup> ]                                       | 5925.02(18)                                                                                     | 7185.4(13)                                                                                     | 3199.2(2)                                                                                       |
| Z                                                         | 4                                                                                               | 4                                                                                              | 2                                                                                               |
| ρ <sub>ber</sub> [g·cm <sup>-3</sup> ]                    | 1.428                                                                                           | 1.181                                                                                          | 1.3994                                                                                          |
| μ [mm <sup>-1</sup> ]                                     | 3.029                                                                                           | 0.728                                                                                          | 2.452                                                                                           |
| F(000)                                                    | 2644.0                                                                                          | 2696.0                                                                                         | 1424.0                                                                                          |
| Crystal size [mm <sup>3</sup> ]                           | 0.31 x 0.24 x 0.14                                                                              | 0.21 x 0.20 x 0.16                                                                             | 0.13 x 0.10 x 0.10                                                                              |
| 2θ for data<br>collection<br>[deg]                        | 7.28-152.74                                                                                     | 1.87-24.22                                                                                     | 3.56-74.43                                                                                      |
| Index-ranges                                              | -15 ≤ h ≤ 10<br>-23 ≤ k ≤ 25<br>-28 ≤ l ≤ 29                                                    | -16 ≤ h ≤ 163<br>-26 ≤ k ≤ 26<br>-24 ≤ l ≤ 24                                                  | -15 ≤ h ≤ 11<br>-16 ≤ k ≤ 15<br>-21 ≤ l ≤ 24                                                    |
| Reflections<br>collected                                  | 23826                                                                                           | 54008                                                                                          | 13871                                                                                           |
| Independent                                               | 12011                                                                                           | 11282                                                                                          | 9639                                                                                            |
| reflections R <sub>int</sub>                              | 0.0225                                                                                          | 0.0978                                                                                         | 0.0350                                                                                          |
| S <sup>a)</sup>                                           | 1.062                                                                                           | 0.811                                                                                          | 1.035                                                                                           |
| R <sub>1</sub> [I ≥ 2σ(I)] <sup>b)</sup>                  | 0.0610                                                                                          | 0.0462                                                                                         | 0.0446                                                                                          |
| wR <sub>2</sub> [all data, F <sup>2</sup> ] <sup>c)</sup> | 0.1648                                                                                          | 0.0803                                                                                         | 0.1156                                                                                          |
| Residual electron<br>density [e Å <sup>-3</sup> ]         | 1.90/-1.30                                                                                      | 0.599/-0.266                                                                                   | 0.619/-0.348                                                                                    |
| CCDC number                                               | 1418422                                                                                         | 1418423                                                                                        | 1418427                                                                                         |

<sup>a)</sup>  $S = \{\sum[w(F_0^2 - F_c^2)^2]/(n - p)\}^{0.5}$ ,  $n$  = number of reflections,  $p$  = number of parameters.

<sup>b)</sup>  $R_1 = \sum|F_0|/\sum|F_c|$ , <sup>c)</sup>  $wR_2 = \{\sum[w(F_0^2 - F_c^2)^2/\sum(F_0^2)^s]\}^{0.5}$

**Note:** Crystals of **4** contained several highly disordered solvent molecules that were removed by SQUEEZE/Platon.

**Table S10:** Crystallographic Data of compound **5**, **6** and [Ni(OAc)<sub>2</sub>(H<sub>2</sub>O)<sub>4</sub>].

|                                                           | <b>5</b>                                                                                        | <b>6</b>                                                                                        | <b>[Ni(OAc)<sub>2</sub>(H<sub>2</sub>O)<sub>4</sub>]</b> |
|-----------------------------------------------------------|-------------------------------------------------------------------------------------------------|-------------------------------------------------------------------------------------------------|----------------------------------------------------------|
| Empirical formular                                        | C <sub>41</sub> H <sub>63</sub> Cl <sub>3</sub> N <sub>10</sub> Ni <sub>2</sub> O <sub>12</sub> | C <sub>42</sub> H <sub>63</sub> Cl <sub>3</sub> N <sub>14</sub> Ni <sub>2</sub> O <sub>12</sub> | C <sub>4</sub> H <sub>14</sub> NiO <sub>8</sub>          |
| Formular weight [g·mol <sup>-1</sup> ]                    | 1111.78                                                                                         | 1179.83                                                                                         | 248.86                                                   |
| Temperature [K]                                           | 173                                                                                             | 170                                                                                             | 170                                                      |
| λ [Å]                                                     | 1.54184 (Cu K <sub>α</sub> )                                                                    | 1.54184 (Cu K <sub>α</sub> )                                                                    | 0.71075 (Mo K <sub>α</sub> )                             |
| Crystal system                                            | monoclinic                                                                                      | triclinic                                                                                       | monoclinic                                               |
| Space group                                               | P2 <sub>1</sub> /c                                                                              | P-1                                                                                             | P2 <sub>1</sub> /c                                       |
| a [Å]                                                     | 17.1218(13)                                                                                     | 11.1608(3)                                                                                      | 4.74771(14)                                              |
| b [Å]                                                     | 15.9325(14)                                                                                     | 15.0248(3)                                                                                      | 11.7147(3)                                               |
| c [Å]                                                     | 19.4659(15)                                                                                     | 16.3126(3)                                                                                      | 8.3144(3)                                                |
| α [°]                                                     | 90.00                                                                                           | 112.1643(18)                                                                                    | 90                                                       |
| β [°]                                                     | 115.046(8)                                                                                      | 91.4575(18)                                                                                     | 93.055(3)                                                |
| γ [°]                                                     | 90.00                                                                                           | 94.8008(17)                                                                                     | 90                                                       |
| V [Å <sup>3</sup> ]                                       | 4810.8(7)                                                                                       | 2519.60(9)                                                                                      | 461.78(2)                                                |
| Z                                                         | 4                                                                                               | 2                                                                                               | 2                                                        |
| ρ <sub>ber</sub> [g·cm <sup>-3</sup> ]                    | 1.535                                                                                           | 1.555                                                                                           | 1.603                                                    |
| μ [mm <sup>-1</sup> ]                                     | 1.020                                                                                           | 3.026                                                                                           | 2.052                                                    |
| F(000)                                                    | 2328.0                                                                                          | 1232.0                                                                                          | 230.0                                                    |
| Crystal size [mm <sup>3</sup> ]                           | 0.20 x 0.10 x 0.10                                                                              | 0.13 x 0.12 x 0.10                                                                              | 0.23 x 0.14 x 0.14                                       |
| 2θ for data collection [deg]                              | 2.12-25.98                                                                                      | 3.19-74.27                                                                                      | 3.01-36.61                                               |
| Index-ranges                                              | -20 ≤ h ≤ 20<br>-19 ≤ k ≤ 19<br>-23 ≤ l ≤ 23                                                    | -12 ≤ h ≤ 13<br>-18 ≤ k ≤ 18<br>-20 ≤ l ≤ 20                                                    | -7 ≤ h ≤ 6<br>-19 ≤ k ≤ 18<br>-10 ≤ l ≤ 11               |
| Reflections collected                                     | 37246                                                                                           | 10101                                                                                           | 8698                                                     |
| Independent reflections                                   | 9334                                                                                            | 8943                                                                                            | 1788                                                     |
| R <sub>int</sub>                                          | 0.0531                                                                                          | 0.0518                                                                                          | 0.0587                                                   |
| S <sup>a)</sup>                                           | 0.955                                                                                           | 1.024                                                                                           | 1.052                                                    |
| R <sub>1</sub> [I ≥ 2σ(I)] <sup>b)</sup>                  | 0.0340                                                                                          | 0.0457                                                                                          | 0.0370                                                   |
| wR <sub>2</sub> [all data, F <sup>2</sup> ] <sup>c)</sup> | 0.0871                                                                                          | 0.1248                                                                                          | 0.0652                                                   |
| Residual electron density<br>[e Å <sup>-3</sup> ]         | 0.663/-0.707                                                                                    | 1.324/-0.652                                                                                    | 0.516/-0.455                                             |
| CCDC number                                               | 1418424                                                                                         | 1418425                                                                                         | 1418426                                                  |

<sup>a)</sup>  $S = \{\sum [w(F_0^2 - F_c^2)^2]\} / (n - p)^{0.5}$ ,  $n$  = number of reflections,  $p$  = number of parameters.

<sup>b)</sup>  $R_1 = \sum |F_0| / \sum |F_c|$ , <sup>c)</sup>  $wR_2 = \{\sum [w(F_0^2 - F_c^2)^2] / \sum (F_0^2)^s\}^{0.5}$

## Literature

- 1 A. L. Spek, *J. Appl. Crystallogr.*, 2003, **36**, 7–13.
- 2 A. L. Spek, *Acta Crystallogr. Sect. D*, 2009, **65**, 148–155.
- 3 G. M. Sheldrick, *Acta Crystallogr. Sect. A*, 2008, **64**, 112–122.
- 4 O. V. Dolomanov, L. J. Bourhis, R. J. Gildea, J. A. K. Howard and H. Puschmann, *J. Appl. Crystallogr.*, 2009, **42**, 339–341.
- 5 Q. Lu, J.-M. Latour, C. J. Harding, N. Martin, D. J. Marrs, V. McKee and J. Nelson, *J. Chem. Soc. Dalton Trans.*, 1994, 1471–1478.
- 6 A. Gennaro, A. A. Isse and E. Vianello, *J. Electroanal. Chem.*, 1990, 203–215.
- 7 R. E. Cramer, W. V. Doorne and R. Dubois, *Inorg. Chem.*, 1975, **14**, 2462–2466.
- 8 C. Harding and others, *J. Chem. Soc. Dalton Trans.*, 1999, 223–228.
